# Supplementary material for: AuAgCu trimetallic nanoparticles based alloy: an advanced electrocatalyst for hydrogen evolution reaction in alkaline media
Source: Royal Society of Chemistry journal article supplement (doi:10.1039/d4ra05826g), 2024-01-01
Supplement: d4ra05826g1.pdf [file d4ra05826g1.pdf]

## Supplementary data

### AuAgCu Trimetallic Nanoparticles Based Alloy: An Advanced Electrocatalyst for Hydrogen Evolution Reaction in Alkaline Media

Kanwal Memon<sup>a\*</sup>, Roomia Memon<sup>ab\*</sup>, Zafar Hussain Ibupoto<sup>c</sup>, Ghufran Ahmed Memon<sup>d</sup>, Halar Haleem<sup>e</sup>, Sirajuddin<sup>f</sup>, Ayaz Ali Memon<sup>a</sup>, Anjum Qureshi<sup>b</sup>, Javed H. Niazi<sup>b</sup>, Ahmed Nadeem<sup>g</sup> and Sabry M Attia<sup>g</sup>

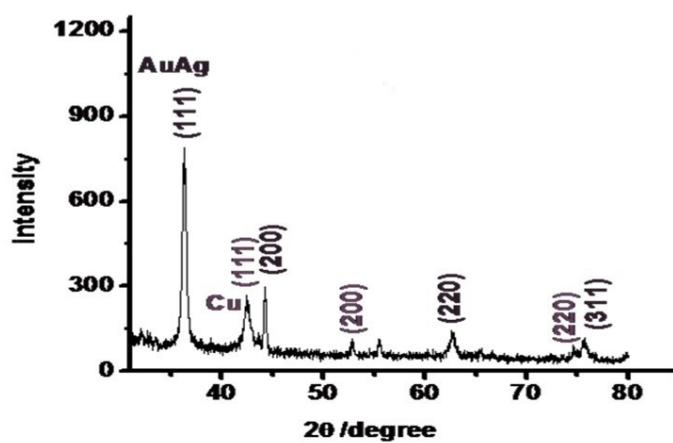

S1: XRD analysis of trimetallic nanoparticles

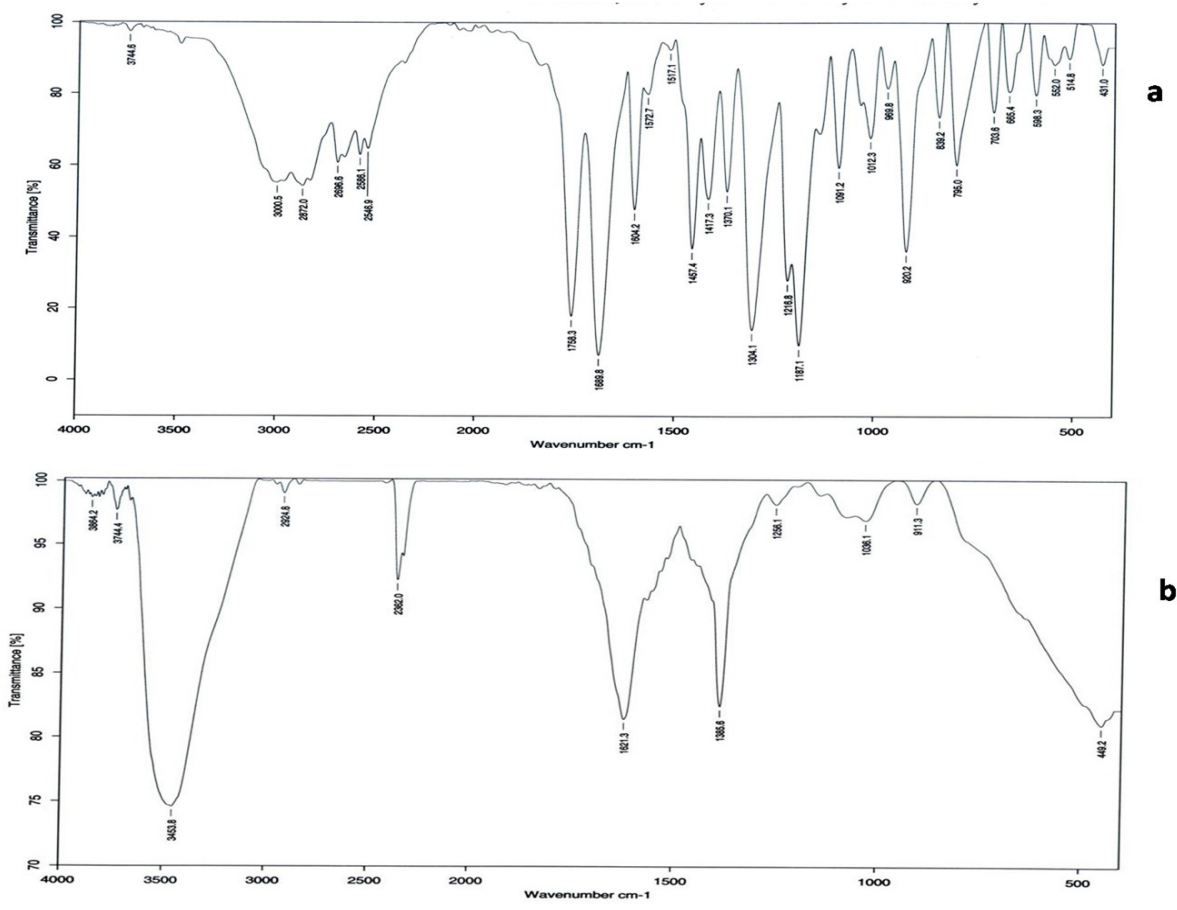

**S2: FT-IR spectra of (A) Aspirin (B) Aspirin capped TNPs**
